# Supplementary material
Source: Springer Nature journal article supplement (https://www.springermedizin.de/resource/supplementary/12985_2010_828_MOESM5_ESM.pdf/9609280)

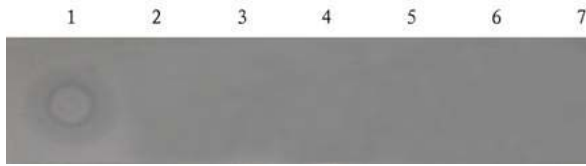

A

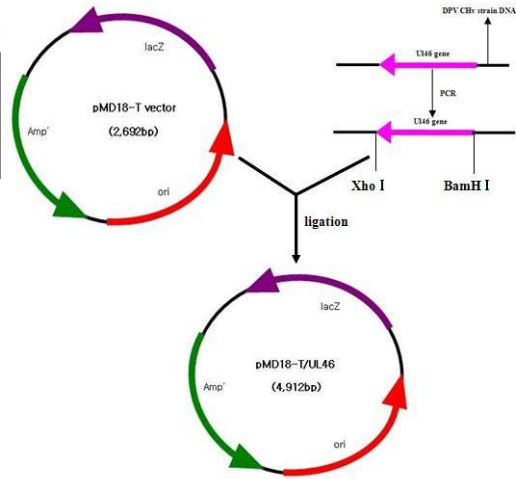

B

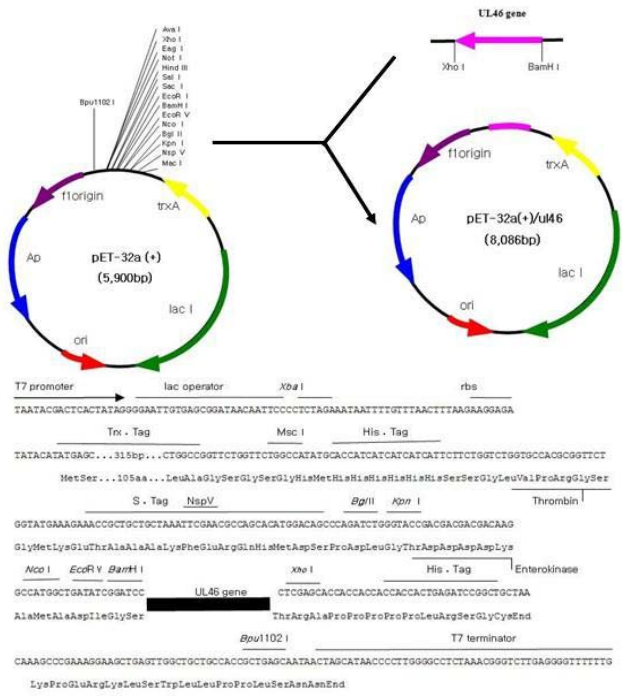

C

Supplement: MOESM5 [file 9609280]
